# Supplementary material for: Performance Monitoring via Functional Near Infrared Spectroscopy for Virtual Reality Based Basic Life Support Training
Source: Front Neurosci. 2019 Dec 12;13:1336. doi: 10.3389/fnins.2019.01336 (PMC6920174; doi:10.3389/fnins.2019.01336)
Supplement: TABLE S1 — Mean oxy values of channel 3 and serious gaming scores of the subjects acquired from the learning management system of the game module. [file Table_1.xlsx]

## Sheet: OXY
	Mean Oxy values of channel 3
	Session	Group	Subject	Scenario	Ch3
	1	1	101	2	1.54254
	1	1	101	3	1.56032
	1	1	102	2	-0.495054
	1	1	102	3	0.932812
	1	1	103	3	0.524024
	1	1	106	2	-0.231557
	1	1	106	3	-1.10178				VR- BLS-	VR+ BLS-	VR+ BLS+	VR- BLS+
	1	1	107	2	3.00625			Day 1 C3 Mean	0.672223	0.828329	0.415291	0.554099
	1	1	107	3	0.312448			Day 2 C3 Mean	0.562611	0.628728	0.957927	0.00733906
	1	2	202	2	0.928835			Day 7 C3 Mean	0.36904	0.252406	0.473634	0.126397
	1	2	202	3	-0.13321			Day 30 C3 Mean	-0.0851478	0.0518546	1.01601	0.534385
	1	2	203	2	1.99113
	1	2	203	3	2.6031
	1	2	206	2	1.18823				VR- BLS-	VR+ BLS-	VR+ BLS+	VR- BLS+
	1	2	206	3	-1.60811			Day 1 C3 Mean	0.672223	0.828329	0.415291	0.554099
	1	3	301	2	1.35577			Day 7 C3 Mean	0.36904	0.252406	0.473634	0.126397
	1	3	301	3	-0.397988
	1	3	302	2	-2.11394
	1	3	302	3	-0.375986
	1	3	303	2	0.513761
	1	3	303	3	0.920454
	1	3	304	2	1.19874
	1	3	304	3	0.372123
	1	3	305	2	1.94432
	1	3	305	3	0.735639
	1	4	401	2	2.15854
	1	4	401	3	-0.682349
	1	4	402	2	1.29902
	1	4	402	3	-0.675442
	1	4	404	2	0.760522
	1	4	404	3	0.820007
	1	4	405	2	1.63629
	1	4	405	3	-0.883802
	2	1	101	2	0.750786
	2	1	101	3	-0.0755894
	2	1	102	2	-0.296013
	2	1	102	3	1.1011
	2	1	103	2	0.59426
	2	1	103	3	-0.628798
	2	1	105	2	3.55657
	2	1	105	3	-0.501448
	2	1	106	2	1.29532
	2	1	106	3	-1.42157
	2	1	107	2	0.870349
	2	1	107	3	1.50637
	2	2	201	2	0.303523
	2	2	202	2	0.898756
	2	2	202	3	-0.336122
	2	2	203	2	0.656213
	2	2	203	3	1.07852
	2	2	206	2	2.34497
	2	2	206	3	-0.544763
	2	3	301	2	0.107698
	2	3	301	3	1.86789
	2	3	302	2	0.850884
	2	3	302	3	0.823998
	2	3	303	2	0.555495
	2	3	303	3	-0.753581
	2	3	304	2	1.60462
	2	3	305	3	2.6064
	2	4	401	2	1.39766
	2	4	401	3	-0.234806
	2	4	402	2	1.02362
	2	4	402	3	0.0234215
	2	4	403	2	-0.618567
	2	4	403	3	-0.0780674
	2	4	404	2	0.953257
	2	4	404	3	-2.14148
	2	4	405	2	0.282657
	2	4	405	3	-0.534297
	3	1	101	2	0.170474
	3	1	101	3	0.98948
	3	1	102	2	-0.202025
	3	1	102	3	0.019415
	3	1	103	2	-0.0936331
	3	1	103	3	-0.328886
	3	1	105	2	1.20818
	3	1	105	3	1.23472
	3	1	106	2	0.206334
	3	1	106	3	-1.16926
	3	1	107	2	1.9443
	3	1	107	3	0.449384
	3	2	202	2	0.537069
	3	2	202	3	0.629351
	3	2	203	2	-0.114644
	3	2	203	3	-0.391015
	3	2	206	2	0.571136
	3	2	206	3	0.282541
	3	3	301	2	-0.0321883				-0.0321883
	3	3	301	3	0.19763				0.19763
	3	3	302	2	0.138476				0.138476
	3	3	302	3	0.475604				0.475604
	3	3	303	2	-0.985639				-0.985639
	3	3	303	3	-0.0201074				-0.0201074		0.473634
	3	3	304	2	1.80584				1.80584
	3	3	304	3	2.17182				2.17182
	3	3	305	2	0.473634
	3	3	305	3	0.511272				0.511272
	3	4	402	2	0.744587
	3	4	402	3	0.820892
	3	4	403	1	-0.43322
	3	4	403	2	0.0110868
	3	4	403	3	-0.0209464
	3	4	404	2	0.607978
	3	4	404	3	-0.0207312
	3	4	405	2	-0.708238
	3	4	405	3	0.136162
	4	1	101	2	-0.515155
	4	1	101	3	0.313411
	4	1	102	2	-0.170375
	4	1	102	3	1.04604
	4	1	103	2	-1.27464
	4	1	103	3	-1.06972
	4	1	105	2	0.329746
	4	1	105	3	0.593089
	4	1	106	2	-0.297645
	4	1	106	3	-0.720225
	4	1	107	2	0.768514
	4	1	107	3	-0.024812
	4	2	202	2	1.11377
	4	2	202	3	-0.405676
	4	2	203	2	-1.15033
	4	2	203	3	1.09935
	4	2	206	2	1.37989
	4	2	206	3	-1.72587
	4	3	301	2	-0.00345435
	4	3	302	2	-0.232775
	4	3	302	3	0.942978
	4	3	303	2	0.383787
	4	3	303	3	1.4128
	4	3	304	2	2.62627
	4	3	304	3	1.08575
	4	3	305	2	2.76394
	4	3	305	3	0.164758
	4	4	401	2	0.631058
	4	4	401	3	0.287622
	4	4	402	2	1.84519
	4	4	402	3	1.67453
	4	4	403	2	-0.535081
	4	4	403	3	0.380525
	4	4	404	2	0.908093
	4	4	404	3	-0.00906611
	4	4	405	2	0.0930751
	4	4	405	3	0.0679019

## Sheet: Game Scores
	Serious Gaming Scores
	Subject	Group	Session	Scenario	Score
	101	1	1	2	50
	101	1	1	3	58
	102	1	1	2	56
	102	1	1	3	66
	103	1	1	2	46
	103	1	1	3	68
	104	1	1	2	89
	104	1	1	3	97
	105	1	1	2	21
	105	1	1	3	11
	106	1	1	2	54			Groups	VR- BLS-	VR+ BLS-	VR+ BLS+	VR- BLS+
	106	1	1	3	50			Day 1 Mean BLS Score	57	57.5385	92.3333	86
	107	1	1	2	66			Day 7 Mean BLS Score	98.4286	96.3333	95.6	96.9
	107	1	1	3	66			Improvement (%)	72.6817	67.4242	3.53791	12.6744
	201	2	1	2	25
	201	2	1	3	29
	202	2	1	2	79
	202	2	1	3	24
	203	2	1	2	59
	203	2	1	3	72
	204	2	1	2	86
	204	2	1	3	76
	205	2	1	2	69
	205	2	1	3	87
	206	2	1	2	24
	206	2	1	3	29
	301	3	1	2	89
	301	3	1	3	100
	302	3	1	2	81
	302	3	1	3	93
	303	3	1	2	100
	303	3	1	3	100
	304	3	1	2	95
	304	3	1	3	97
	305	3	1	2	81
	305	3	1	3	84
	401	4	1	2	91
	401	4	1	3	94
	402	4	1	2	87
	402	4	1	3	97
	403	4	1	2	75
	403	4	1	3	79
	404	4	1	2	93
	404	4	1	3	98
	405	4	1	2	71
	405	4	1	3	75
	101	1	3	2	100
	101	1	3	3	100
	102	1	3	2	94
	102	1	3	3	92
	103	1	3	2	100
	103	1	3	3	95
	104	1	3	2	100
	104	1	3	3	100
	105	1	3	2	100
	105	1	3	3	100
	106	1	3	2	100
	106	1	3	3	100
	107	1	3	2	97
	107	1	3	3	100
	201	2	3	2	93
	201	2	3	3	100
	202	2	3	2	93
	202	2	3	3	93
	203	2	3	2	93
	203	2	3	3	95
	204	2	3	2	100
	204	2	3	3	100
	205	2	3	2	97
	205	2	3	3	96
	206	2	3	2	100
	206	2	3	3	96
	301	3	3	2	87
	301	3	3	3	100
	302	3	3	2	90
	302	3	3	3	90
	303	3	3	2	100
	303	3	3	3	100
	304	3	3	2	98
	304	3	3	3	100
	305	3	3	2	94
	305	3	3	3	97
	401	4	3	2	100
	401	4	3	3	98
	402	4	3	2	95
	402	4	3	3	91
	403	4	3	2	97
	403	4	3	3	100
	404	4	3	2	100
	404	4	3	3	100
	405	4	3	2	91
	405	4	3	3	97
